# Supplementary material
Source: PubMed Central journal article supplement (PMC3024758)

## SUPPLEMENTAL DATA

### SUPPLEMENTAL FIGURE LEGENDS

**Fig. 1S. Optimization of G $\alpha$  purification by GST-Ric-8 association required empirical evaluation of independently produced G $\alpha$  baculovirus stocks.** Two-independently produced G $\alpha$ olf baculovirus preparations were amplified twice for 5 days in exponentially growing suspension *Sf9* insect cells (1/100 culture vol. each time). Increasing doses of the prepared secondary amplified G $\alpha$ olf viral stocks (200  $\mu$ l - 3.5 ml) and 1 ml of the same amplified GST-Ric-8BFL stock were used to infect 50 ml cultures of exponentially growing High-Five insect cells in suspension at  $2.0 \times 10^6$  cells/ml. High-Five cells were recovered 48 h later by centrifugation, and after medium removal, subjected to lysis and glutathione Sepharose isolation of the GST-Ric-8BFL:G $\alpha$ olf complex as described in the Experimental Procedures. G $\alpha$ olf was eluted from each column with  $\text{AlF}_4^-$  buffer and quantified by Bradford assay. Equivalent elution volumes from each column were resolved by reducing SDS-PAGE and proteins visualized with Coomassie Blue. Increasing infection dose with G $\alpha$ olf baculovirus isolate #1 decreased the amount of recovered G $\alpha$ olf protein, whereas increasing G $\alpha$ olf baculovirus isolate #2 infection dose increased G $\alpha$ olf protein recovery. These experiments demonstrate the need to empirically titrate G $\alpha$  virus volumes. A viral plaque assay could alternatively be used to quantify G $\alpha$  virus plaque forming units required to achieve maximal expression, but ultimately, viral infection level required correlation with *functional* G $\alpha$  recovery from GST-Ric-8/glutathione Sepharose with  $\text{AlF}_4^-$ . It was found to be simpler to titrate G $\alpha$  viral stocks empirically by volume used and expression/purification, rather than to also include the additional time-consuming step of conducting plaque-assays.

**Fig. 2S. Hi-trap Q anion exchange chromatography of purified GST-Ric-8A and G $\alpha$ q.** Purified GST-Ric-8A (~2  $\mu$ g) and G $\alpha$ q (~3  $\mu$ g) were mixed in 10 ml of Buffer N (20 mM Hepes, pH 8.0, 2 mM  $\text{MgCl}_2$ , 1 mM EDTA, 1 mM DTT, 11 mM CHAPs, and protease inhibitor mixture) and pumped onto a 1 ml Hi-trap Q column at 0.5 ml/min. The column was washed with Buffer N and eluted with a linear gradient to 500 mM NaCl in Buffer N. The column eluate was fractionated. Fractions containing protein were resolved by SDS-PAGE and stained with Coomassie blue. Monomeric G $\alpha$ q eluted at a lower NaCl concentration than the GST-Ric-8A:G $\alpha$ q complex, which remained intact during Hi-trap Q chromatography and elution.

**Fig. 3S. Expression of GST-Ric-8BFL or GST-Ric-8A reduced endogenous insect cell G protein expression.** High-Five insect cells were infected with #1, GST; #2, GST-Ric-8A; or #3 GST-Ric-8BFL baculoviruses. Cells were harvested 48 h post infection and lysed with detergent free lysis buffer (20 mM HEPES-KOH, pH 8.0, 150 mM NaCl, 1 mM DTT, 1 mM EDTA, protease inhibitor mixture) by nitrogen cavitation using a Parr bomb. Lysates were collected and nuclei and unbroken cells were removed by centrifugation at 500 x g (post-nuclear supernatant, PNS). Crude membranes were prepared by centrifuging the PNS at 100,000 x g for 45 min. Washed membranes (Memb.) were solubilized in reducing SDS-Laemmli-sample buffer. PNS (50  $\mu$ g), or membranes (50  $\mu$ g) were resolved by SDS-PAGE alongside the indicated purified G protein subunits and Western blotted with, **A and B**, anti-G $\alpha$ q/11 C-19 antibody (Santa Cruz, Inc.), **C and D**, anti-G $\alpha$ i/G $\alpha$ s antiserum, P960<sup>4</sup> and **E and F**, anti-G $\beta$ <sub>1,4</sub> antiserum, B600<sup>1</sup>. The positions of recombinant (R) and insect cell G protein subunits are indicated. Endogenous insect cell G protein subunit expression was decreased in both the PNS and membrane fractions of GST-Ric-8A and GST-Ric-8B, but not GST expressing cells. A non-specific protein was

detected by the B600 antiserum in the PNSs, but not in the membrane fraction. This non-specific protein did not exhibit a Ric-8-dependent decrease in expression.

**Fig. 4S. Prepared G $\alpha$ i/q/13 subunits do not contain detectable insect cell G protein contaminants, while G $\alpha$ s-class preparations may contain trace levels of a contaminating insect cell G $\alpha$ q-like protein.** G $\alpha$  subunits (100 ng ea.) produced by the GST-Ric-8 association method were resolved alongside 50  $\mu$ g of washed insect cell membranes by SDS-PAGE. The gels were Western blotted with G protein subunit antibodies described in the legend to Fig. 2S (anti-G $\alpha$ q/11, anti-G $\beta$ <sub>1,4</sub>, anti-G $\alpha$ i/G $\alpha$ s). **A**, The Santa Cruz G $\alpha$ q/11 antibody C-19 strongly detected purified recombinant G $\alpha$ q, and a G $\alpha$ q-like protein in insect cell membranes (●). This antibody also weakly detected doublet protein bands in lanes containing pure G $\alpha$ s<sub>s</sub> and G $\alpha$ olf. The lower molecular weight species (●) migrated at a distance on the gel that was nearly coincident with recombinant and insect cell G $\alpha$ q. The higher molecular weight species migrated at positions where recombinant G $\alpha$ s<sub>s</sub> (\*) and G $\alpha$ olf (■) migrated. One possibility is that the lower molecular weight band is a trace level of contaminating insect cell G $\alpha$ q present in the G $\alpha$ s<sub>s</sub> and G $\alpha$ olf preparations. Given the intensity of the recombinant G $\alpha$ q (100 ng) signal detected by this antibody, these potential G $\alpha$ q contaminants represent <1% mol G $\alpha$ q / mol G $\alpha$ s<sub>s</sub> or G $\alpha$ olf in each preparation. **B**, Common G $\alpha$  antiserum, P960 detected insect cell G $\alpha$ i, and a band of higher apparent molecular weight (~47-48 kDa) that might be an insect cell G $\alpha$ s-like variant. Neither insect cell G $\alpha$ i, nor the higher molecular weight protein (G $\alpha$ s) were detectable contaminants in any recombinant G $\alpha$  preparation. **C**, Common G $\beta$ <sub>1,4</sub> antiserum, B600 detected insect cell G $\beta$  on membranes. G $\beta$  was not a detectable contaminant in any G $\alpha$  preparation.

**Fig. 5S. GST-Ric-8A co-expression did not significantly alter the yield of G $\beta$ <sub>1</sub> $\gamma$ <sub>2</sub> prepared by the traditional G $\alpha$ i<sub>1</sub>-hexahistidine-tag association method<sup>3,5</sup>.** High-five insect cells (1L) grown to a density of 2.0 x 10<sup>6</sup> cells/ml were infected with Hexahistidine-tagged-G $\alpha$ i<sub>1</sub>, G $\beta$ <sub>1</sub>, G $\gamma$ <sub>2</sub>, and GST, or GST-Ric-8A recombinant baculoviruses. Cells were harvested 48 h post infection and lysed by nitrogen cavitation in a detergent free buffer (20 mM HEPES-KOH, pH 8.0, 100 mM NaCl, 1 mM EDTA, 2 mM MgCl<sub>2</sub>, 10 mM  $\beta$ ME, 10  $\mu$ M GDP, protease inhibitor mixture) using a Parr bomb. Unbroken cells and nuclei were removed by centrifugation at 500 x g, and membranes were prepared by centrifugation at 100,000 x g. Membranes (5.5 mg/ml) were extracted with 1% w/v sodium cholate buffer. Detergent insoluble material was removed by centrifugation at 100,000 x g. The detergent extract was diluted four-fold with C12E10 buffer (20 mM HEPES-KOH, pH 8.0, 100 mM NaCl, 1 mM MgCl<sub>2</sub>, 10 mM  $\beta$ ME, 10  $\mu$ M GDP, 0.5% C12E10, and protease inhibitor mixture) and loaded onto pre-equilibrated 2 ml bed volume Ni-NTA (Qiagen) columns. The columns were washed and G $\beta$ <sub>1</sub> $\gamma$ <sub>2</sub> and His<sub>6</sub>-G $\alpha$ i<sub>1</sub> were sequentially isolated using the published method<sup>3,5</sup>. **A**, Ni-column Mg-GDP-AIF<sub>4</sub> eluates (fractions 2-4 are shown) contained recombinant G $\beta$ <sub>1</sub> (and  $\gamma$ <sub>2</sub>, not shown), and minor contaminants. Subsequent Ni-column elution with 150 mM imidazole released His<sub>6</sub>-G $\alpha$ i<sub>1</sub> (fractions 1-3 are shown). GST-Ric-8A was detected by Western blot as a co-eluate with the His<sub>6</sub>-G $\alpha$ i<sub>1</sub>. **B**, The Ni-column Mg-GDP-AIF<sub>4</sub> eluate fractions were then pooled and G $\beta$ <sub>1</sub> $\gamma$ <sub>2</sub> was purified using the method of Kozasa and Gilman with a HiTrap Q anion exchange column (GE Biosciences) used in place of the standard Mono Q anion exchange column<sup>3,5</sup>. The purity of G $\beta$ <sub>1</sub> $\gamma$ <sub>2</sub> obtained whether GST or GST-Ric-8A was expressed was the same (nearly homogenous). Slightly more G $\beta$ <sub>1</sub> $\gamma$ <sub>2</sub> (16%) was obtained per mass of membrane input into the purification procedure when GST-Ric-8A was expressed (0.78  $\mu$ g G $\beta$ <sub>1</sub> $\gamma$ <sub>2</sub>/mg membrane protein) versus GST (0.67  $\mu$ g G $\beta$ <sub>1</sub> $\gamma$ <sub>2</sub>/mg membrane protein). However, this owed to the fact that less GST-Ric-8A membranes were recovered from 1L of culture (770 mg) than GST membranes (910 mg), resulting in nearly equivalent yields from both preparations (GST, 0.61 mg G $\beta$ <sub>1</sub> $\gamma$ <sub>2</sub>) and GST-Ric-8A (0.6 mg G $\beta$ <sub>1</sub> $\gamma$ <sub>2</sub>).

## REFERENCES

1. Linder, M. E., Middleton, P., Helper, J. R., Taussig, R., Gilman, A. G., and Mumby, S. M. (1993) *Proc. Natl. Acad. Sci.* **90**, 3675-3679.
2. P J Casey, H K Fong, M I Simon, and A G Gilman. Gz, a guanine nucleotide-binding protein with unique biochemical properties. (1990) *J. Biol. Chem.* **265**: 2383-2390.
3. Kozasa, T. (1999) *Purification of Recombinant G Protein  $\alpha$  and  $\beta\gamma$  Subunits from Sf9 cells*, CRC Press, Boca Raton, FL.
4. Mumby, S.M. and Gilman, A. G. Synthetic peptide antisera with determined specificity for G protein  $\alpha$  or  $\beta$  subunits. (1991) *Methods Enzymol.* **195**:215-233.
5. Kozasa, T. and Gilman, A.G. Purification of recombinant G proteins from Sf9 cells by hexahistidine tagging of associated subunits. Characterization of alpha 12 and inhibition of adenylyl cyclase by alpha z. (1999). *J. Biol. Chem.* **270**: 1734-1741.

FIG 1S The amounts of G $\alpha$  baculovirus used to optimize expression and purification of functional G $\alpha$  protein required empirical evaluation.

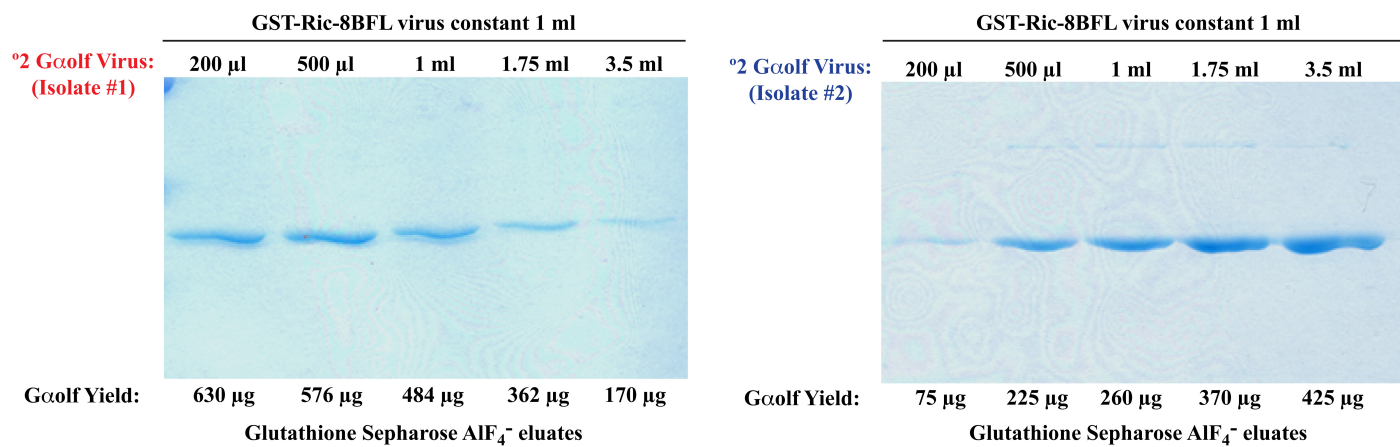

**Fig. 2S Anion Exchange Separation of the GST-Ric-8A:G $\alpha$ q complex from G $\alpha$ q.**

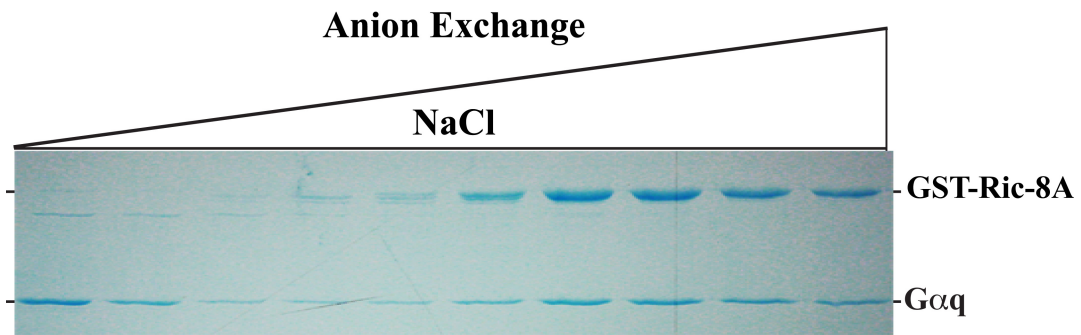

**Fig. 3S**

**Analysis of Whole Cell and Membrane Expressed Endogenous Insect Cell G proteins after GST, GST-Ric-8A, of GST-Ric-8B expression.**

**Insect Cell G Protein Expression Levels +/- Ric-8 Expression.**

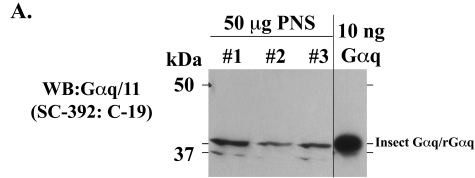

**Insect Cell Membrane G Protein Expression Levels +/- Ric-8 Expression.**

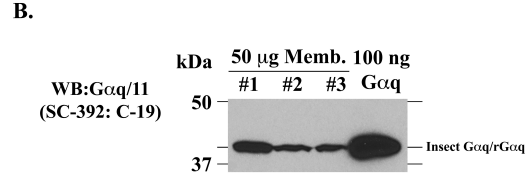

PNS= Post nuclear supernatant  
 #1 = +GST  
 #2 = +GST-Ric8A  
 #3 = +GST-Ric8BFL

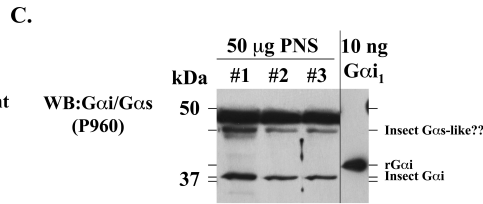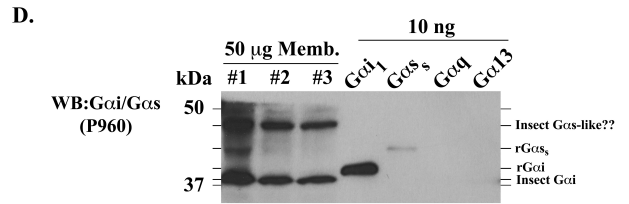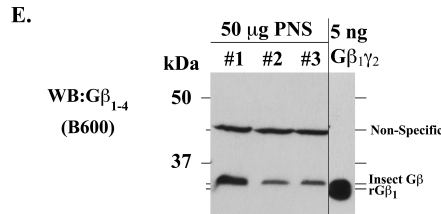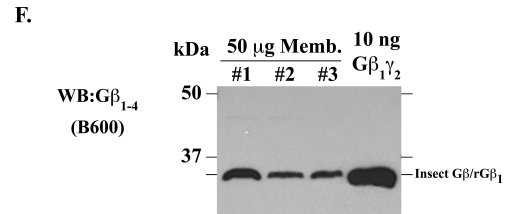

Fig. 4S

### Analysis of Insect Cell G Protein Contaminants in Recombinant $G\alpha$ Preparations.

A.

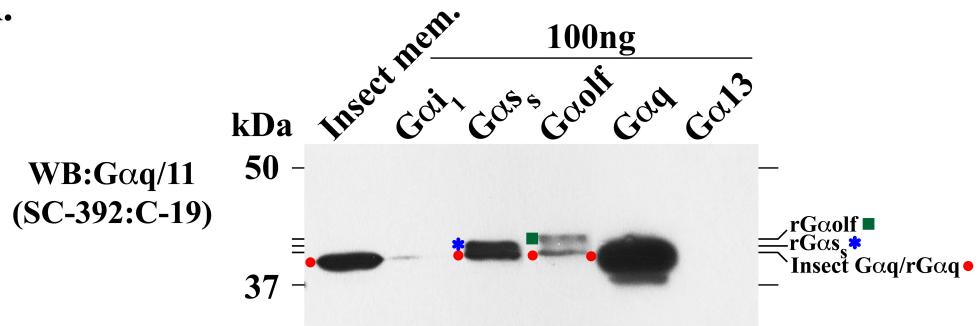

B.

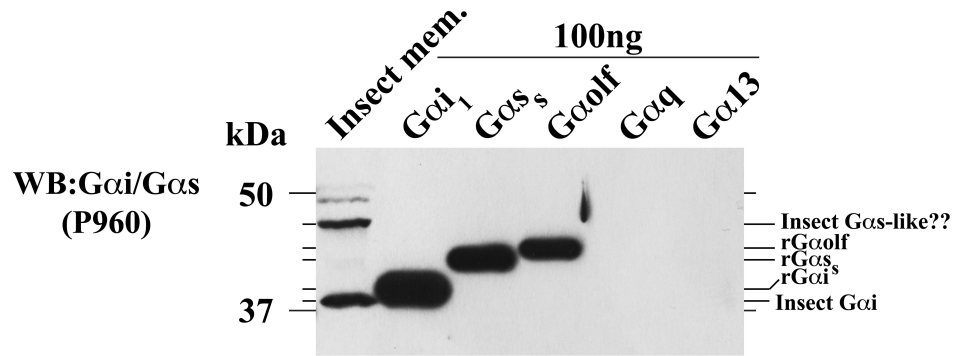

C.

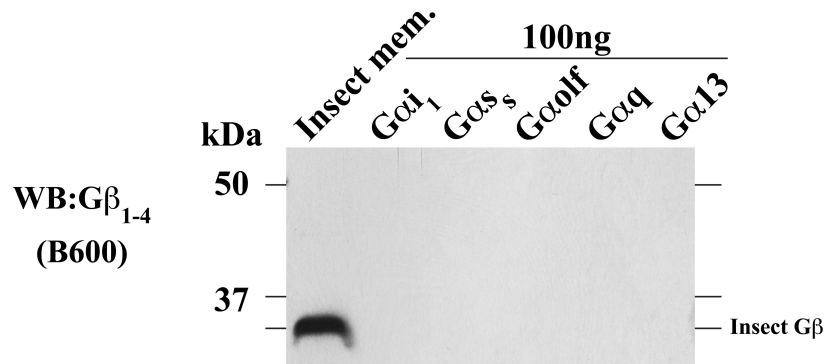

**Fig. 5S Traditional Purification of  $G\beta_1\gamma_2$  from GST-Ric-8A- and GST-Expressing Insect Cells.**

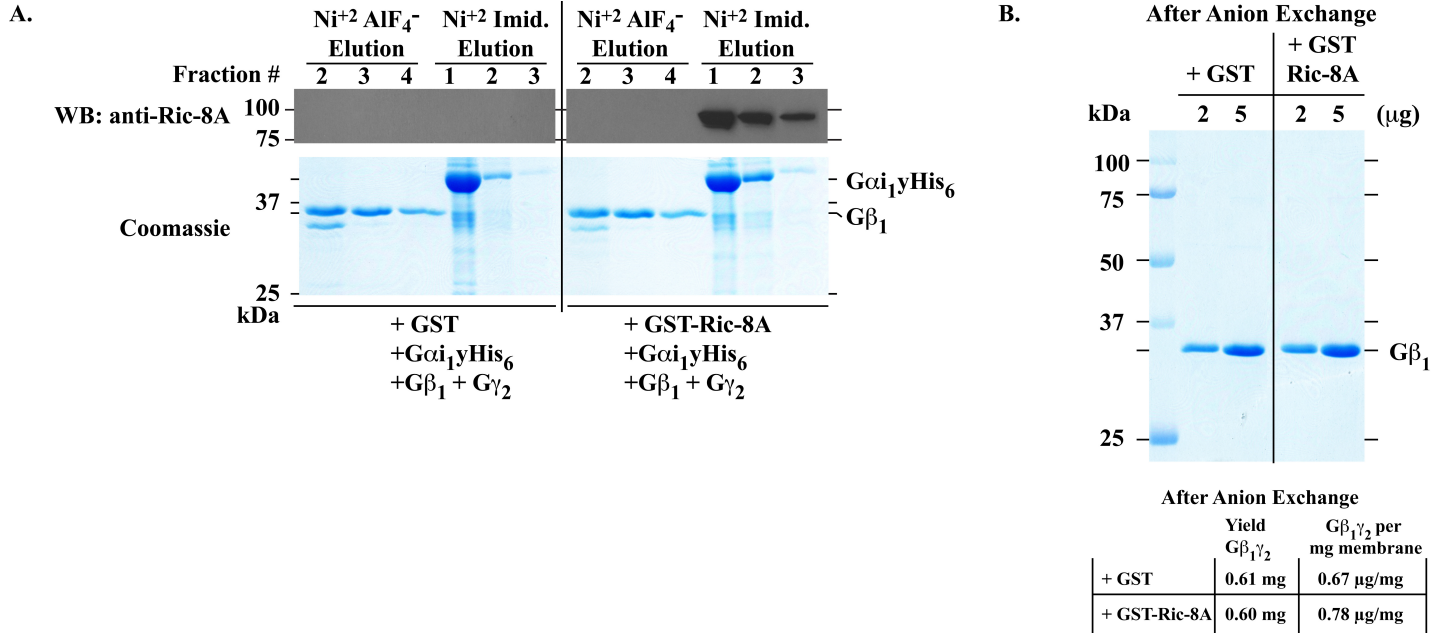

Supplement: supp_M110.178897_jbc.M110.178897-1.pdf [file supp_M110.178897_jbc.M110.178897-1.pdf]
